# Supplementary material for: Synchronous monitoring of underwater dynamic/static pressure based on piezoelectric/capacitive polyester elastomer/carbon nanotube composites
Source: Royal Society of Chemistry journal article supplement (doi:10.1039/d4ta02298j), 2024-01-01
Supplement: d4ta02298j1.pdf [file d4ta02298j1.pdf]

## Supplementary Information

### Synchronous Monitoring of Underwater Dynamic/Static Pressure Based on Piezoelectric/Capacitive Polyester Elastomer/Carbon Nanotube Composites

*Yuxing Tang<sup>a†</sup>, Qing Dang<sup>a†</sup>, Wei Zhang<sup>b</sup>, Haiquan Guo<sup>e</sup>, Hong Pan<sup>a</sup>, Yong Xiang<sup>a,d</sup>,*

*Bin Liao<sup>\*,b</sup> and Xiaoran Hu<sup>\*,a,d</sup>*

<sup>a</sup> School of Materials and Energy, University of Electronic Science and Technology of China, Chengdu, China

<sup>b</sup> Key Laboratory of Photochemical Conversion and Optoelectronic Materials, Technical Institute of Physics and Chemistry, Chinese Academy of Sciences, No. 29 Zhongguancun East Road, Haidian District, Beijing 100190, P. R. China

<sup>c</sup> Advanced Energy Institute, University of Electronic Science and Technology of China, Chengdu, China

<sup>d</sup> Sichuan flexible display materials genome engineering center, Chengdu, China

<sup>e</sup> Inner mongolia north hauler joint stock company limited, GHQ@CHINANHL.COM

(Correspondence to Bin Liao, email: [binliao@mail.ipc.ac.cn](mailto:binliao@mail.ipc.ac.cn) and Xiaoran Hu, e-mail: [Huxiaoran@uestc.edu.cn](mailto:Huxiaoran@uestc.edu.cn))

<sup>†</sup> Equal contributions

Fig S1 and Fig S2 demonstrate the preparation of DPBPE composite as well as DPBPE sensors, respectively.

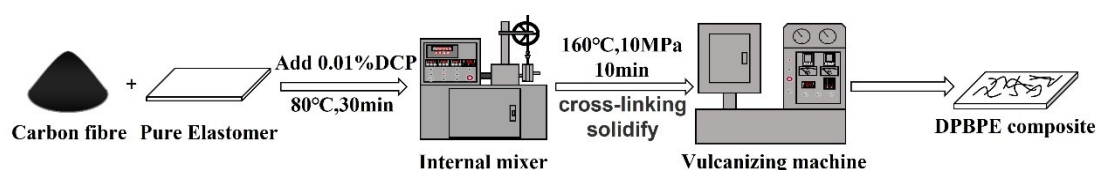

Figure S1. Preparation of DPBPE composite

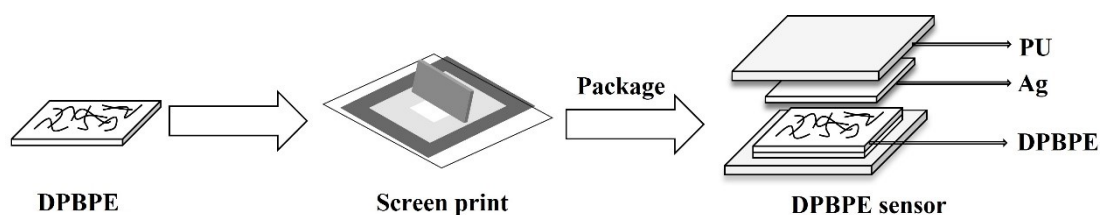

Figure S2. Preparation of DPBPE sensor

The compositions of the DPBPE material are confirmed by  $^1\text{H}$ NMR in Figure S3. The characteristic peaks at 1.51 ppm (a) and 5.08 ppm (b) are derived from hypomethylene group and side methyl group in lactic acid, respectively. The peaks at 5.73 ppm (c) and 6.35 ppm (d) are peaks for the two protons from C=C in itaconic acid, and the characteristic peak at 3.36 ppm (e) is the proton adjacent to the double bond in itaconic acid. The characteristic peaks at 1.29 ppm (h), 1.62 ppm (g) and 2.29 ppm (f,i) originate from sebacic acid. The peaks at 1.71 ppm (k) and 4.09 ppm (j,l) belong to butane-1,4-diol, and the split peak at 4.09 ppm is due to the different chemical environments around the butane-1,4-diol. The  $^1\text{H}$ NMR results (Figure S1) confirm the DPBPE material is synthesized with designed chemical compositions.

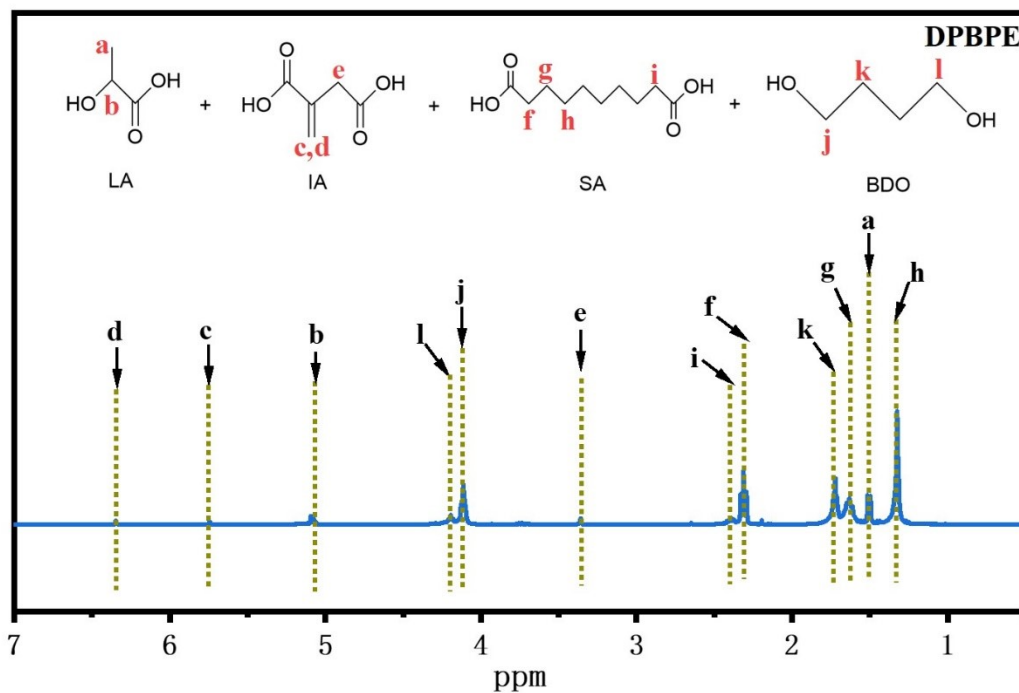

Figure S3.  $^1\text{H}$ -MR spectra of the DPBPE material

In Figure S4, when a high pressure of 54 kPa is applied on the DPBPE sensor, its internal dipoles deflect, generating a piezoelectric current of 12 nA. Once stabilized, the distance between internal carbon fibers decreases with the applied pressure, resulting in a change in capacitance value. When an extra pressure as low as 9.8 Pa is applied while the high pressure of 54 kPa exists, a piezoelectric signal is still capable of being observed, indicating its piezoelectric and capacitive function serves without any mutual interference.

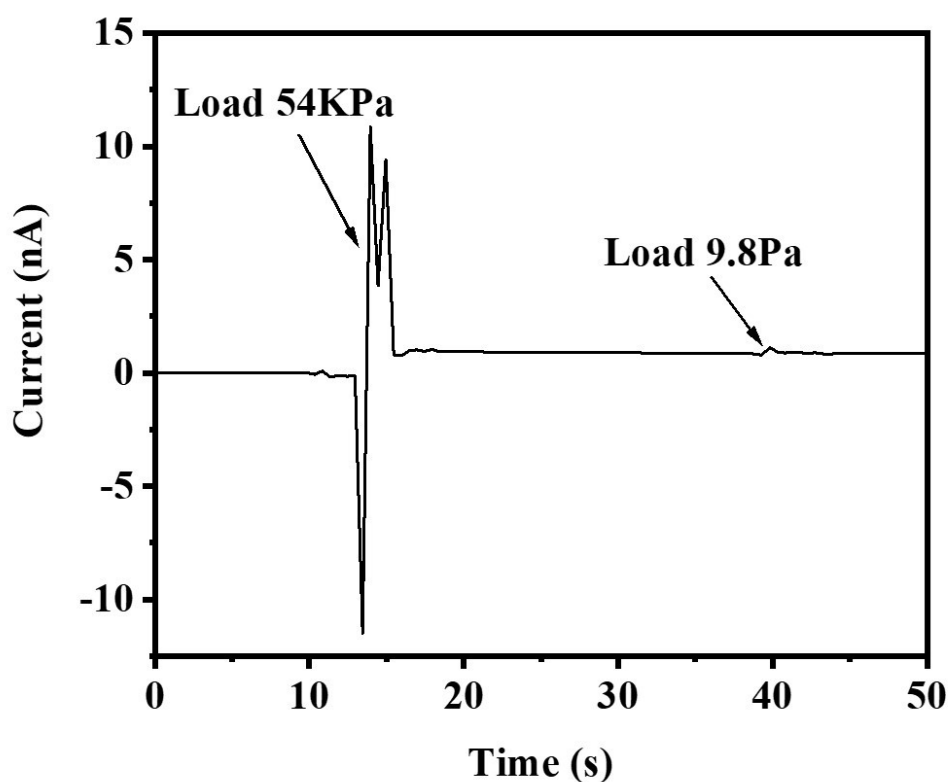

Figure S4. Applying a feedback of 9.8 Pa at a high pressure of 54 kPa.

Table S1 shows the performance of the sensors in different materials and constructions. Compared to these the DPBPE sensors have the advantage of achieving integrated and synchronous identification of dynamic and static pressures as well as a wide measuring range.

**Table S1** Performance comparison of different sensors

| <b>Materials</b>          | <b>Framework</b> | <b>Measurement range</b> | <b>Static pressure sensitivity</b> | <b>Dynamic pressure sensitivity</b> | <b>Simultaneous identification</b> |
|---------------------------|------------------|--------------------------|------------------------------------|-------------------------------------|------------------------------------|
| DPBPE                     | --               | 250 kPa                  | 0.031 kPa <sup>-1</sup>            | 0.8 mV/N                            | ☑                                  |
| Mxene/LS/PVA <sup>1</sup> | Fiber film       | 250 kPa                  | 5.5 kPa <sup>-1</sup>              | low                                 | --                                 |

|                                   |                         |         |                        |               |    |
|-----------------------------------|-------------------------|---------|------------------------|---------------|----|
| Perfluorocarbon/PDMS <sup>2</sup> | Hierarchically porous   | 400 kPa | 0.18 kPa <sup>-1</sup> | low           | -- |
| PVDF-TrFE/Mxene <sup>3</sup>      | Fiber film              | 20N     | --                     | 2.51mV/(N*μm) | -- |
| PDMS/PVDF <sup>4</sup>            | Multilayer architecture | 800 kPa | --                     | 7.7 mV/kPa    | -- |
| PVDF/PVDF-TrFE <sup>5</sup>       | Nanopillars             | 80N     | --                     | 250mV/N       | -- |

In Fig. S5 the capacitance values fed back by the step pressure are shown, with the steps becoming less pronounced as the pressure value increases, reaching the upper measurement limit at 240 kPa.

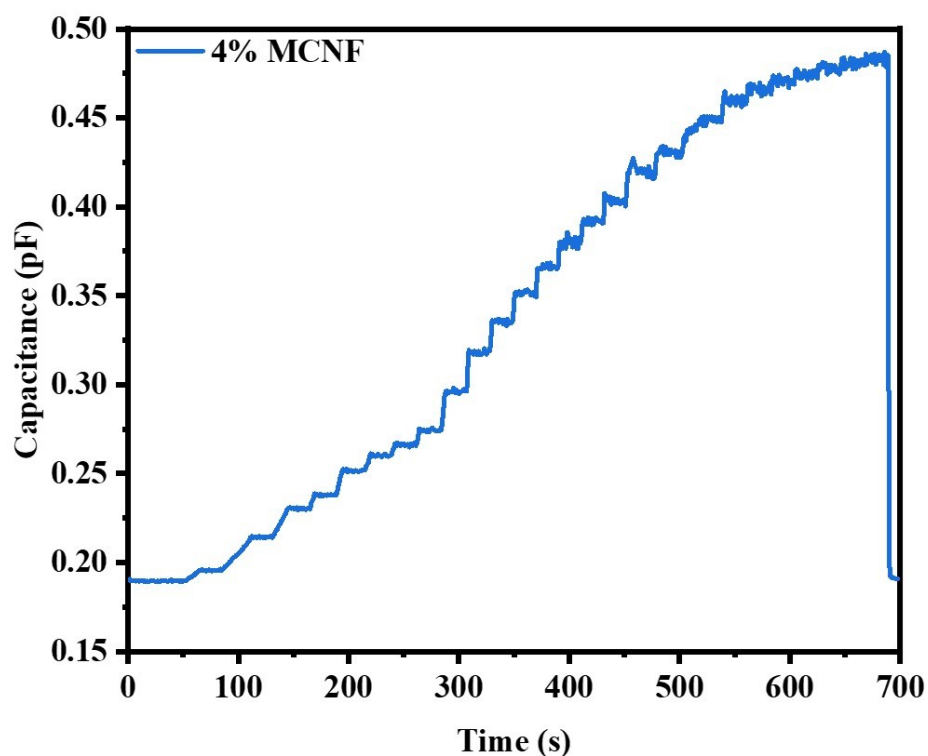

Figure S5. Capacitance value corresponding to the step pressure from 0 to 240kpa

In Fig. S6, when the DPBPE sensor is subjected with higher pressure, the internal

micro-capacitor plate spacing is further reduced and the dipole deflection is increased, presenting higher capacitance and voltage values.

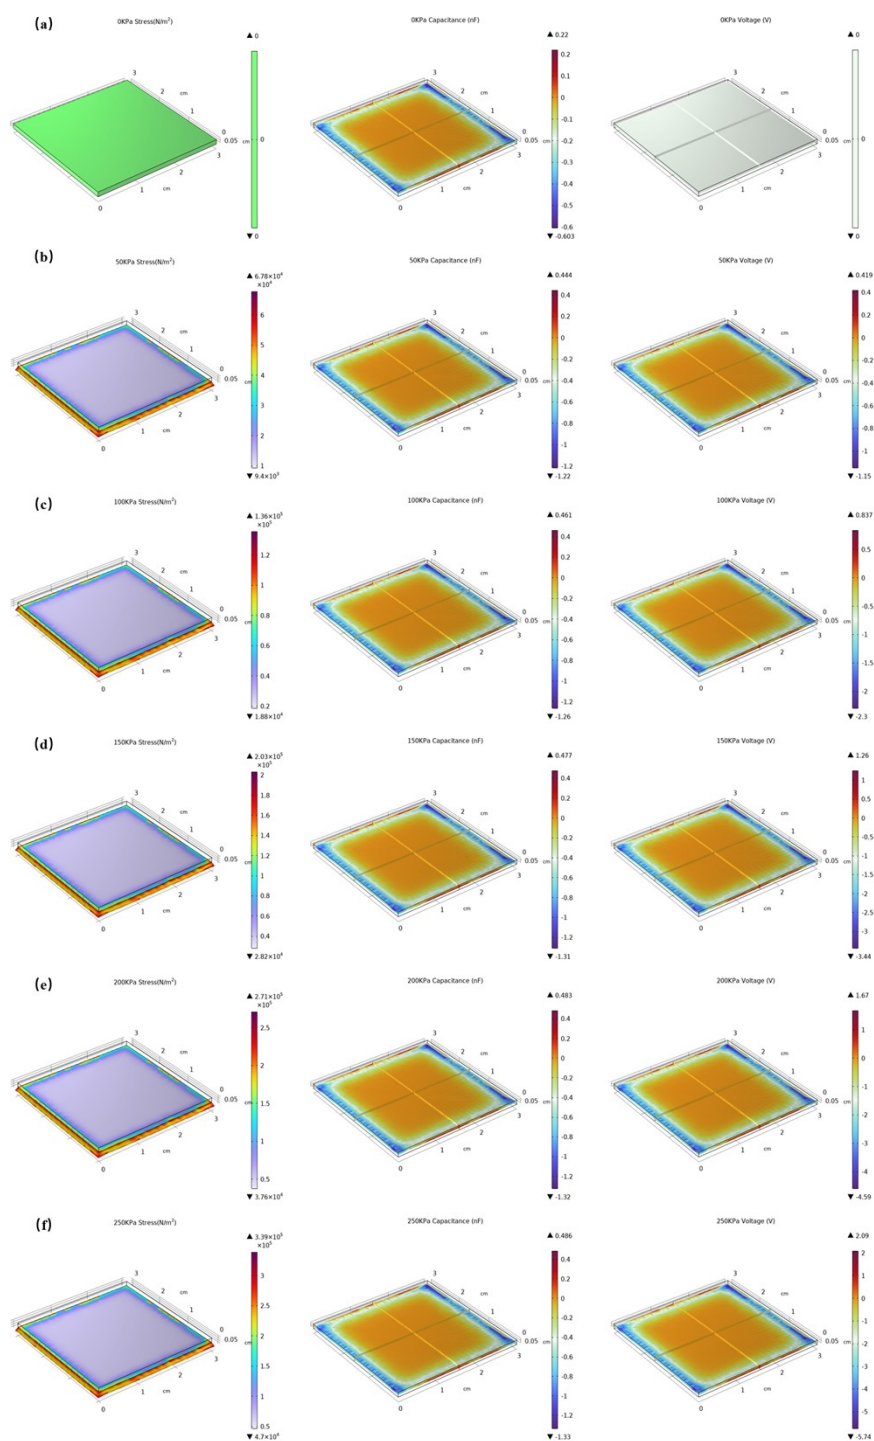

Figure S6 The deformation, capacitance and voltage response of DPBPE under different pressures. (a)0 kPa, (b)50 kPa, (c)100 kPa, (d)150 kPa, (e)200 kPa, (f)250kPa.

In Fig. S7, the 4% MCNF DPBPE exhibits a higher C peak and a lower O peak,

compared to blank DPBPE. This is due to the interface interaction between the elastomer and MCNF.

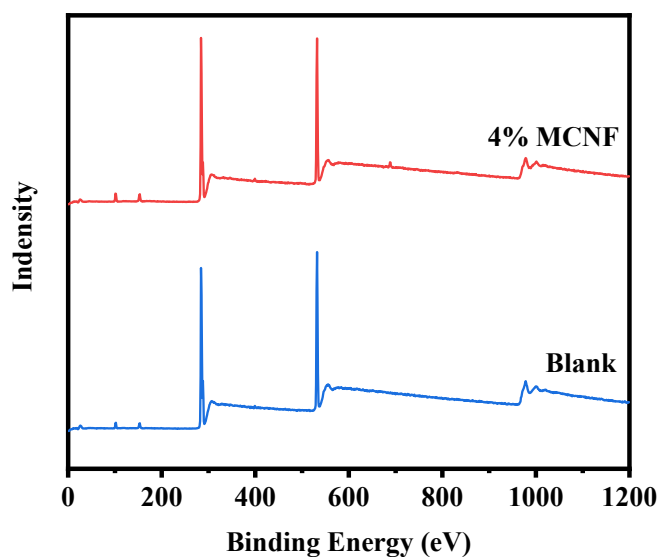

Figure S7. XPS of 4%MCNF and Blank DPBPE

Table S2 Performance comparison of capacitance sensors

| Materials               | range      | response to small forces | Relative Capacitance Change Rate | Sensitivity                             | Response Time | Recovery Time |
|-------------------------|------------|--------------------------|----------------------------------|-----------------------------------------|---------------|---------------|
| DPBPE                   | 0-240 kpa  | $\approx$ (1 kpa)        | 154%                             | $3.09 \times 10^{-2}$ kPa <sup>-1</sup> | 75 ms         | 100ms         |
| Ga-In/PDMS <sup>6</sup> | 0-1.10 MPa | -                        | 13.1%                            | 11 kPa <sup>-1</sup>                    | -             | -             |
| CB/PDMS <sup>7</sup>    | 0-20 N     | $\approx$ (0.1 N)        | 90.4%                            | 0.028N <sup>-1</sup>                    | -             | -             |
| CB/PDMS <sup>8</sup>    | 0-320kpa   | -                        | 4.30%                            | -                                       | -             | -             |
| PDMS <sup>9</sup>       | 0-111kpa   | $\approx$ (0.2 Pa)       | 152%                             | 0.078 Pa <sup>-1</sup>                  | 100ms         | 100ms         |

Pa)

In Fig. S8, compared to neat DPBPE, the glass transition temperature of 4% MCNF/DPBPE composite material did not show a significant increase. Additionally, the composite material maintained its amorphous structure during the cooling process, which indicates that the 4% MCNF/DPBPE composite maintains a high elasticity and amorphous structure at temperatures above -50°C.

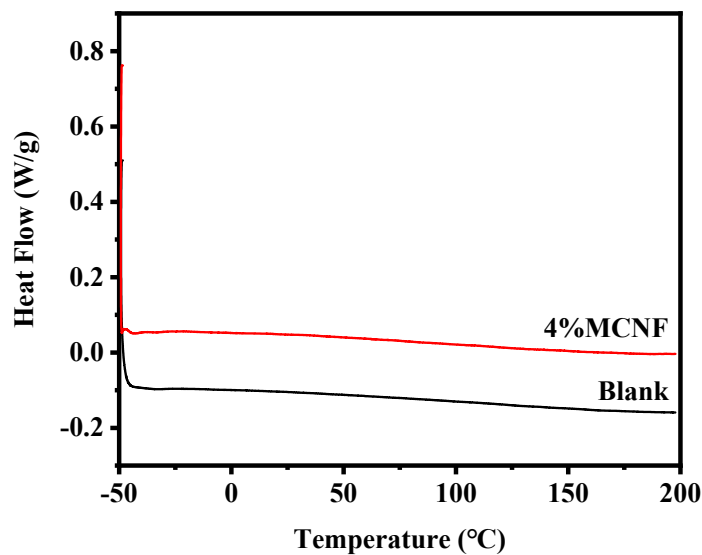

Figure S8. DSC of 4%MCNF and Blank DPBPE

## Reference

1. S. Sharma, A. Chhetry, S. Zhang, H. Yoon, C. Park, H. Kim, M. Sharifuzzaman, X. Hui and J. Y. Park, *ACS Nano*, 2021, **15**, 4380-4393.
2. J. Hwang, Y. Kim, H. Yang and J. H. Oh, *Composites Part B: Engineering*, 2021, **211**.
3. S. Wang, H.-Q. Shao, Y. Liu, C.-Y. Tang, X. Zhao, K. Ke, R.-Y. Bao, M.-B. Yang and W. Yang, *Composites Science and Technology*, 2021, **202**.
4. W. Lin, B. Wang, G. Peng, Y. Shan, H. Hu and Z. Yang, *Advanced Science*, 2021, **8**.
5. R. A. Surmenev, R. V. Chernozem, I. O. Pariy and M. A. Surmeneva, *Nano Energy*, 2021, **79**.
6. S. Ali, D. Maddipatla, B. B. Narakathu, A. A. Chlaihawi, S. Emamian, F. Janabi, B. J. Bazuin and M. Z. Atashbar, *IEEE Sensors Journal*, 2019, **19**, 97-104.
7. Y. Zhu, X. Chen, K. Chu, X. Wang, Z. Hu and H. Su, *Sensors*, 2022, **22**, 628.



8. Y. Ko, H. Yoon, S. Kwon, H. Lee, M. Park, I. Jeon, J. A. Lim, S. Chung, S.-S. Lee, B. J. Sung, J.-H. Kim and H. Kim, *Composites Part B: Engineering*, 2020, **201**, 108337.
9. Bijender and K. Ashok, *Materials Chemistry and Physics*, 2023, **304**, 127872.
10. J. Cui, B. Zhang, J. Duan, H. Guo and J. Tang, *Journal*, 2016, **16**.
